# Organisational Culture in Residential Aged Care Facilities: A Cross-Sectional Observational Study

Christopher Etherton-Beer<sup>1\*</sup>, Lorraine Venturato<sup>2,3</sup>, Barbara Horner<sup>4</sup>

**1** Western Australian Centre for Health and Ageing, The University of Western Australia, Crawley, Western Australia, Australia, **2** School of Nursing and Midwifery, Griffith University, Brisbane, Queensland, Australia, **3** Research Team, RSL Care, Brisbane, Queensland, Australia, **4** Centre for Research on Ageing, Curtin University, Perth, Western Australia, Australia

## Abstract

**Background:** Organisational culture is increasingly recognised as important for provision of high-quality long-term care. We undertook this study to measure organisational culture in residential aged care facilities in two Australian states.

**Methodology/Principal Findings:** Cross-sectional observational study in 21 residential aged care facilities in Western Australia (n = 14) and Queensland (n = 7), Australia. Staff and next-of-kin of residents participated. Measurement comprised surveys of facility staff and residents' next-of-kin, and structured observation of indicators of care quality. Staff tended to rate organisational culture positively. Some qualitative feedback from staff emphasised negative perceptions of communication, leadership and teamwork. Staffing levels were perceived as a dominant challenge, threatening care quality. Direct observation revealed variability within and between facilities but suggested that most facilities (n = 12) were in the typical range, or were quality facilities (n = 8).

**Conclusion:** There was scope to strengthen organisational culture in participating aged care facilities.

**Citation:** Etherton-Beer C, Venturato L, Horner B (2013) Organisational Culture in Residential Aged Care Facilities: A Cross-Sectional Observational Study. PLoS ONE 8(3): e58002. doi:10.1371/journal.pone.0058002

**Editor:** Jose Vina, University of Valencia, Spain

**Received:** November 8, 2012; **Accepted:** January 29, 2013; **Published:** March 7, 2013

**Copyright:** © 2013 Etherton-Beer et al. This is an open-access article distributed under the terms of the Creative Commons Attribution License, which permits unrestricted use, distribution, and reproduction in any medium, provided the original author and source are credited.

**Funding:** This study was funded as part of a National Health and Medical Research Council Dementia Research Grant Program Strategic Award (number 458797). The funder had no role in study design, data collection and analysis, decision to publish, or preparation of the manuscript.

**Competing Interests:** The authors have declared that no competing interests exist.

\* E-mail: christopher.etherton-beer@uwa.edu.au

## Introduction

Although older people often enjoy productive and healthy longer lives, population ageing presents many challenges. Residential care is an important component of service delivery for older people with complex health problems, particularly severe dementia [1]. Costs, staff shortages, staff turnover and communication problems are cited as barriers to sustainable improvements in the care of people living in residential care facilities [2]. Although educational interventions in residential care may be evaluated positively by participants [3], we found evidence that impact on residents may be restricted by limited staff participation [4]. Focusing on sustainable culture change may offer an alternative method of quality improvement in residential care settings.

Organizational culture refers to the psychology, attitudes, experiences, beliefs and values (personal and cultural) of an organization [5]. We found that teamwork, communication and leadership were consistently recognised as key elements of organisational culture which potentially influence staff and resident outcomes in care facilities [2]. Other empirical evidence supports these findings, showing that management behaviour (such as the extent of open communication patterns and relationship-oriented leadership behaviour) is associated with resident outcomes [6]. Systematic review of the evidence regarding leadership indicates that leadership styles focused on people and

relationships are associated with more positive outcomes than leadership styles focused on tasks [7].

Organisational culture is increasingly recognised as important for the provision of high quality long-term care [8,9]. However, there are few data regarding the prevailing organisational culture in Australian residential care facilities. Thus a knowledge gap persists regarding organisational culture, and the potential impact of quality improvement initiatives targeting the organisational culture, in Australian long-term (residential) aged care facilities. We undertook the present study to measure organisational culture in residential aged care facilities in two Australian states.

## Methods

### Ethics

This research was approved by the Human Research Ethics Committees of the Universities of Western Australia, Curtin University and Griffith University. Representatives of all participating facilities provided written consent.

### Study design & setting

A cross sectional observational study conducted in a convenience sample of 21 RCFs in Western Australia (n = 14) and Queensland (n = 7). The sample included 2 high care ("nursing home") only facilities, 8 low care ("hostel") only facilities and 11

facilities providing both high and low level care. The median number of beds in participating facilities was 70 (IQR 60–94).

## Participants

In Western Australia, 20 control facilities from a previously conducted study [10] were invited to participate. These facilities were owned and operated by diverse providers. Telephone contact was initially made with facility managers and a brief overview of the study presented. All managers agreed to a follow up email being sent providing more detailed written information regarding the study.

In Queensland, seven facilities were invited to participate. Facilities were owned and operated by a single not-for-profit aged care provider in the context of an existing, long-standing research partnership with one author (LV). Invited facilities were accessible (located in South-East Queensland) and not engaged in other research projects at that time. Contact with facilities was initially made through Area Managers, who were provided with information on the study. This was followed up by email and telephone calls to facility managers to provide more information on the study. All facility managers agreed to participate.

After facilities had consented to participate, an on-site meeting was held between facility managers and research staff. An information session regarding the study was then held at each facility (staff, family members and residents were welcome to attend these) to profile the study, encourage participation, answer any queries raised and distribute flyers and posters regarding the study. All staff working in participating facilities (unless temporary, agency or short term contract staff), as well as the ‘next-of-kin’ of all residents were eligible to participate in the study.

## Data collection

Baseline data included surveys of all staff and family members (‘next-of-kin’) at each facility and independent observation using a structured observation tool. Data were collected in August and September 2010.

The staff survey comprised the Nursing Home Adaptation of the Shortell Organisation and Management Survey, a valid and reliable tool [11] which has been used extensively in the United States [12]. The Nursing Home adaptation comprises a 15 item Relationships and Communication scale and 11 Item Teamwork and Leadership scale. The introduction to the survey was amended slightly for the Australian context with permission of Dr Jill Scott-Caziewell (personal communication). The introduction to these questions was ‘*This section refers specifically to ‘nurses’ but the questions are relevant to everyone. For example you may think of the ‘nursing leadership’ as people like your Facility Manager, Director, Assistant Director or Charge Nurse. Similarly ‘nurses’ refers to carers, enrolled nurses and registered nurse.*’ Staff surveys also included the Engagement/Empowerment and Team communication factor items of the Healthcare Team Vitality Instrument. This is a valid [13] instrument which was developed to provide a short tool to assess aspects of teamwork and collaboration. The actual survey items are provided in Table 1.

The next-of-kin survey comprised the F-involve scale [14], a valid and reliable measure of families’ perceived involvement in care. With permission of Dr Colin Reid (personal communication), the F-involve scale was modified slightly (adding “not applicable” to the last three items, which were dementia specific, and allowing respondents to select “unsure” i.e. a five point Likert scale).

As this was the first use of these tools in Australia that we were aware of we assessed whether ‘the survey captured my opinions regarding leadership and communication in our organisation’ and whether ‘the survey captured my opinions regarding my involve-

ment in my family member’s care’ (using 5 point Likert scales). In both the F-Involve and modified Shortell surveys, we also assessed: time taken to complete the survey; whether the ‘the survey questions are easy to understand’; and space was provided for free text ‘comments you have regarding the survey questions or format’.

Surveys were distributed to all staff (n = 1891) and next-of-kin (n = 1501) by their facility managers. However 220 of the next-of-kin surveys included an error (‘strongly disagree’ was printed instead of ‘agree’). Thus, 1281 correct next-of-kin surveys were distributed to facilities. Distribution of staff surveys was most often by attaching surveys to staff payslips. Facility mailing lists were used to send the survey to the recorded next-of-kin. Survey completion was encouraged by postcards and an incentive was provided (in the form of a draw for a voucher). RACF staff returned 356 surveys (response rate 19%). 331 correctly printed next-of-kin surveys were returned (26%). 66 incorrectly printed next-of-kin surveys were returned (30%) and discarded.

Facilities were observed using the Observable Indicators of Nursing Home Care Quality Instrument (OIQ) [15]. This 30 item instrument requires walk through tours of each facility being surveyed for 20 to 30 minutes during usual visiting hours preferably near a mealtime. Two observers, who were authors or research staff (see acknowledgements), first met with the facility manager and then conducted the walk through observations. Field notes were made during the walk through regarding observers’ impressions, general ambience of facility, the level of engagement of staff, activities of residents (both organised and informal), and physical attributes of the facility. The two observers then independently rated the OIQ, before meeting to discuss their ratings question by question and together complete a third consensus rating. Each of the 30 items is rated on a 5 point scale (1–5). Total scores are then categorised in three groups. A total score  $\geq 128$  suggests a quality nursing home. Scores  $\leq 103$  suggest a nursing home with quality issues. Scores between these numbers are typical of most nursing homes.

## Data handling and analysis

Quantitative survey data were read by optical scanning. Quantitative data were handled in PASW Statistics 18 (IBM Corporation, New York, USA). Staff survey scale scores were calculated by summing the individual items and dividing by the number of non-missing items. Total F-involve scores were calculated by summation (not applicable, unsure and missing data scoring zero), and then scaled ( $*20/\text{number of non-zero responses}$ ) to produce scores that could be compared to the original scale. Internal reliability was calculated (Cronbach’s alpha). We also inspected correlations between scales.

Observational data sets from 21 sites were randomly allocated amongst the WA and Queensland research teams and coded independently by two study staff. Research staff independently read and analysed data sets from each facility for key words and phrases, then independently analysed key words and phrases across selected facilities to reveal common themes. Staff then met with the authors from each State to review coding and common themes and to reach consensus. Themes agreed from each State were then discussed, combined and consensus reached across both States regarding the summary themes and illustrative uncoded data.

Free text responses to the surveys were transcribed and randomly allocated for independent coding by two members of the study staff. The analysts then met to review each other’s coding, reach consensus and create a thematic summary. All staff members and authors then reviewed and agreed the final

**Table 1.** Staff responses to individual survey items [n (%)].

|                                                                                                                    | <b>Strongly Disagree n(%)</b> | <b>Dis-agree n(%)</b> | <b>Unsure n(%)</b> | <b>Agree n(%)</b> | <b>Strongly Agree n(%)</b> |
|--------------------------------------------------------------------------------------------------------------------|-------------------------------|-----------------------|--------------------|-------------------|----------------------------|
| <i>Shortell – Relationships and Communication</i>                                                                  |                               |                       |                    |                   |                            |
| I look forward to working with our staff each day.                                                                 |                               | 16 (5)                | 27 (8)             | 221 (63)          | 89 (25)                    |
| It is easy for me to talk openly with our staff.                                                                   | 2 (1)                         | 19 (5)                | 42 (12)            | 209 (60)          | 79 (23)                    |
| There is good communication between staff across shifts                                                            | 10 (3)                        | 61 (17)               | 81 (23)            | 167 (47)          | 33 (9)                     |
| I feel that the information that I get is accurate                                                                 |                               | 32 (9)                | 60 (17)            | 228 (65)          | 31 (9)                     |
| I find it enjoyable to talk to other staff                                                                         | 1 (0)                         | 7 (2)                 | 29 (8)             | 233 (66)          | 82 (23)                    |
| Staff members are well informed about what I happening during other shifts                                         | 6 (2)                         | 75 (22)               | 83 (24)            | 158 (45)          | 26 (7)                     |
| Information passed between staff is accurate                                                                       | 4 (1)                         | 42 (12)               | 104 (30)           | 182 (53)          | 14 (4)                     |
| It is easy to ask for advice from other staff                                                                      | 5 (1)                         | 20 (6)                | 36 (10)            | 231 (66)          | 56 (16)                    |
| When a resident's condition changes, I get the right information quickly.                                          | 10 (3)                        | 52 (15)               | 55 (16)            | 182 (52)          | 48 (14)                    |
| I take pride in being a part of this team.                                                                         |                               | 10 (3)                | 31 (9)             | 184 (52)          | 126 (36)                   |
| The staff has a good understanding of goals for each resident.                                                     | 1 (0)                         | 35 (10)               | 76 (22)            | 186 (53)          | 50 (14)                    |
| There are no delays in relaying information aboutthe care of the residents.                                        | 6 (2)                         | 48 (14)               | 84 (24)            | 174 (50)          | 35 (10)                    |
| I identify with the goals of this nursing home.                                                                    | 3 (1)                         | 8 (2)                 | 32 (9)             | 207 (59)          | 98 (28)                    |
| I feel I am a part of this team.                                                                                   | 3 (1)                         | 20 (6)                | 28 (8)             | 182 (52)          | 117 (33)                   |
| The staff has a good understanding of the resident care plan.                                                      | 2 (1)                         | 33 (9)                | 59 (17)            | 196 (56)          | 60 (17)                    |
| <i>Shortell – Teamwork and Leadership.</i>                                                                         |                               |                       |                    |                   |                            |
| Nursing Leadership provides strong clinical guidance and advice to the nurses.                                     | 7 (2)                         | 19 (6)                | 56 (17)            | 197 (58)          | 59 (17)                    |
| Nursing leadership is sensitive to the needs of staff                                                              | 10 (3)                        | 33 (10)               | 68 (20)            | 167 (50)          | 54 (16)                    |
| Nursing leadership is clear about what they expect from staff                                                      | 9 (3)                         | 24 (7)                | 55 (17)            | 182 (55)          | 62 (19)                    |
| Nursing leadership encourages nurses to take initiative                                                            | 8 (2)                         | 26 (8)                | 66 (20)            | 182 (55)          | 50 (15)                    |
| Nursing leadership asks us what we think                                                                           | 18 (5)                        | 37 (11)               | 79 (24)            | 156 (47)          | 44 (13)                    |
| Nurses are certain where they stand with the nursing leadership                                                    | 9 (3)                         | 27 (8)                | 81 (24)            | 179 (54)          | 35 (11)                    |
| The nursing leadership is in touch with staff views and concerns                                                   | 19 (6)                        | 44 (13)               | 77 (23)            | 156 (47)          | 38 (11)                    |
| Nursing leadership makes decisions with input from the staff                                                       | 12 (4)                        | 37 (11)               | 84 (25)            | 153 (46)          | 45 (14)                    |
| Nursing leadership gives staff chances to grow                                                                     | 16 (5)                        | 29 (9)                | 68 (20)            | 167 (50)          | 53 (16)                    |
| Other nursing homes seem to have a high opinion of us                                                              | 5 (1)                         | 16 (5)                | 140 (42)           | 120 (36)          | 55 (16)                    |
| Working as a team with other departments makes our work easier.                                                    | 4 (1)                         | 15 (4)                | 48 (14)            | 197 (59)          | 72 (21)                    |
| <i>HTVI – Engagement/Empowerment</i>                                                                               |                               |                       |                    |                   |                            |
| If I have an idea about how to make things better on this unit, the manager and other staff are willing to try it. | 4 (1)                         | 41 (12)               | 76 (22)            | 182 (53)          | 40 (12)                    |
| My ideas really seem to count on this unit.                                                                        | 12 (4)                        | 41 (12)               | 93 (28)            | 163 (48)          | 29 (9)                     |
| Care team members on this unit feel free to question the decisions or actions of those with more authority         | 20 (6)                        | 41 (12)               | 86 (25)            | 156 (46)          | 37 (11)                    |
| <i>HTVI – Team Communication</i>                                                                                   |                               |                       |                    |                   |                            |
| I can discuss challenging issues with care team members on this unit.                                              | 5 (1)                         | 23 (7)                | 38 (11)            | 207 (61)          | 61 (19)                    |
| I speak up if I have a patient safety concern.                                                                     | 1 (0)                         | 2 (1)                 | 9 (3)              | 173 (51)          | 153 (45)                   |

doi:10.1371/journal.pone.0058002.t001

summary of themes (and selections of illustrative uncoded data) from the survey data.

## Results

### Survey of facility staff

Respondents were largely personal carers or nursing staff (152 [43%] carers, 40 [11%] registered nurses and 17 [5%] enrolled nurses). Allied health and therapy assistant staff (n = 26; 8%), support staff (cleaning, catering, laundry and maintenance n = 42; 12%), administrative and management (n = 53; 15%) and other staff (n = 20; 6%) also responded. Few staff were young (19 [5%] ≤25 years, 33 [9%] 26–35 years, 69 [19%] 36–45 years, 112 [31%] were aged 46–55 years, 74 [21%] 56–65 years, 10 [3%] ≥65 years, 39 [11%] missing). The median length of service was 2.8 (IQR 1.3, 5.8) years.

Staff reported positive relationships and communication at their facility (Table 1; median Shortell scale score 3.8, IQR 3.5, 4.2). Team work and leadership were also rated positively (median scale score 3.7, IQR 3.3, 4.1). The median total Shortell scale score was 3.8 (IQR 3.5, 4.1). Reported engagement/empowerment (median HTVI scale score 3.7; IQR 3.0–4.0) and communication (median 4.0, IQR 4.0, 4.5) were also positively assessed using the Healthcare Team Vitality Index.

Some qualitative feedback from staff emphasised negative perceptions of aspects of communication, leadership and teamwork. Teamwork was sought and valued, but sometimes perceived to be lacking. Communication was perceived as challenging at times, with some attempts at communication ineffective:

*‘Staff meetings are intimidating and methods of communication “tell us what you think” forms are ridiculed’*

Staff levels were perceived as a dominant challenge, threatening care quality:

*‘As usual, the main complaint appears (in my opinion) to be poor staffing in patient/carer ratios. Although staff are concerned and caring, pressure of work results in cut back to care time available’*

The importance of leaders establishing and maintaining the culture of an organisation was emphasised. Leadership was perceived to have concrete influences on organisations in areas such as staff retention.

*‘This facility is poorly managed in every area....32 staff members have resigned in the last 6 weeks’*

Despite these difficulties and challenges, resilient personal values were emphasised:

*‘I am proud to work at <organisation name>, dedication, honesty, trust’*

### Survey of family involvement in care

Responses were received from 331 family members, who reported that their relative had lived in the facility 1.7 (0.8, 3.1) years. (Table 2) Total F-involve scores were 46.1±11.9. The scaled (i.e. corrected for missing items, and answers of “not applicable” or “unsure”) scores were 55.3±11.4.

Respondents were concerned that facilities did not necessarily act on information provided, and suggested solutions to facilitate communication, such as providing family members of new residents with a list of facility contacts.

*‘As my mother has been in aged care for over 5 years, at some point in that time some of the information has been supplied. Is it just filed away?’*

Like facility staff, family respondents focused on staff mix, turnover and workloads as major challenges impacting communication and care.

*‘a lot of staff changes at <facility name> which has confused me let alone my mother who is confused some of the time’*

*‘I find staff are too busy to talk about family members and that I am a nuisance.’*

Family respondents also identified potential to strengthen teamwork.

*‘a major problem also appears to be barriers to effective communication and action between different staff categories e.g. nursing, carers, cleaning, kitchen, with each seeming to operate within their own cells most of the time rather than more effectively as a team’*

Respondents did emphasise quality aspects of care they observed.

*‘The critical aspect of care from my perspective is the quality of affection, respect shown to my mother. It’s not so evident in the formal structures but in the minor day-to-day attentions she receives’*

Being welcome to visit the facility and participate in the community there was highly valued.

*‘Something I appreciate very much is that I feel welcome arriving there at any time and being able to take part in whatever is going on at the time, and, that all the staff are really friendly and willing to assist with any enquiry’*

### Observation at facilities

The mean score for the OIQ in the 21 facilities was 124.5±8.7. One facility scored below 104 (suggesting quality issues), and 8 scored above 127 (suggesting a quality nursing home). The remaining 12 scored in the typical range.

Field notes emphasised variability within and between facilities.

*‘Resident staff interaction was really variable across the facility. Where staff responded well to residents their engagement and communication was caring and appropriate..... while in High Care there was almost no engagement with residents. Staff fed in silence and did not engage with the resident at all’*

The physical environment and design was a frequent theme, perceived to have some potential to influence staff work and interactions, as well as resident care. However there was not necessarily correlation between the physical environment and the interactions observed between staff and other staff or residents, or

**Table 2.** F-involve results.

|                                                                                                                                | Strongly Disagree | Somewhat Disagree | Somewhat Agree | Strongly Agree | Does not apply |
|--------------------------------------------------------------------------------------------------------------------------------|-------------------|-------------------|----------------|----------------|----------------|
| Staff have created opportunities for me to meaningfully participate in my family member's day.                                 | 5 (2%)            | 48 (15%)          | 37 (11%)       | 177 (55%)      | N/A            |
| I have been asked about my family member's personal history                                                                    | 13 (4%)           | 43 (13%)          | 25 (8%)        | 168 (52%)      | N/A            |
| I have been asked about my family member's preferences and values                                                              | 12 (4%)           | 50 (15%)          | 37 (11%)       | 158 (48%)      | N/A            |
| I am able to dine with my family member if I want to                                                                           | 4 (1%)            | 16 (5%)           | 45 (14%)       | 162 (50%)      | N/A            |
| I have been asked to bring in pictures, letters, and other personal items to teach staff about my family member                | 33 (10%)          | 119 (37%)         | 34 (11%)       | 92 (29%)       | N/A            |
| I feel like I am involved in decision-making about my family member's care when he or she cannot make decisions for themselves | 12 (4%)           | 38 (12%)          | 24 (7%)        | 181 (56%)      | N/A            |
| The facility has a support group                                                                                               | 15 (5%)           | 34 (10%)          | 163 (50%)      | 85 (26%)       | N/A            |
| I was introduced to the different staff members at the facility when my family member was admitted                             | 14 (4%)           | 79 (24%)          | 13 (4%)        | 159 (49%)      | N/A            |
| Staff explained to me the rules and procedures at the facility upon admission                                                  | 8 (2%)            | 42 (13%)          | 28 (9%)        | 176 (54%)      | N/A            |
| Administrators have asked my opinions about the quality of care provided at this facility                                      | 28 (9%)           | 99 (30%)          | 32 (10%)       | 122 (37%)      | N/A            |
| The facility holds family information meetings                                                                                 | 15 (5%)           | 54 (17%)          | 79 (24%)       | 130 (40%)      | N/A            |
| I feel like my family member has been well cared for                                                                           | 4 (1%)            | 13 (4%)           | 22 (7%)        | 165 (50%)      | N/A            |
| I trust the staff members at this facility                                                                                     | 4 (1%)            | 10 (3%)           | 32 (10%)       | 179 (55%)      | N/A            |
| I am informed about changes in my family member's care plan                                                                    | 14 (4%)           | 67 (21%)          | 33 (10%)       | 150 (47%)      | N/A            |
| Staff have helped me to plan for the death of my family member                                                                 | 31 (10%)          | 142 (47%)         | 57 (19%)       | 61 (20%)       | N/A            |
| Staff have helped me to plan for the handling of my family member's estate upon his or her death                               | 51 (17%)          | 176 (60%)         | 47 (16%)       | 16 (5%)        | N/A            |
| I feel comfortable phoning staff members and talking to them about how my family member is doing                               | 4 (1%)            | 23 (7%)           | 22 (7%)        | 190 (58%)      | N/A            |
| Staff have helped me understand the difficult behaviours that my family member sometimes has                                   | 13 (4%)           | 52 (16%)          | 26 (8%)        | 137 (42%)      | 34 (10%)       |
| Staff have taught me how to communicate with my family member as the disease has progressed                                    | 24 (7%)           | 84 (26%)          | 38 (12%)       | 54 (17%)       | 12 (4%)        |
| Staff have helped me to understand how dementia affects my family member                                                       | 23 (7%)           | 81 (25%)          | 23 (7%)        | 76 (23%)       | 18 (6%)        |

Data are n (% of total). Rows that sum to <100% indicate missing data. N/A = not applicable.  
doi:10.1371/journal.pone.0058002.t002

the wellbeing of residents. For example, physical spaces (such as gardens and outdoor areas) were not necessarily accessible or used by residents. Instead, relationships and community were emphasised as having the potential to impact resident wellbeing regardless of the physical environment:

*'Physically lovely facility but quite unfriendly, no obvious evidence of resident engagement in facility'*

Communal dining experiences were recognised as often being indicative of the broader impression of community at the facility. Management and leadership was also an important theme in the observers' field notes, including the influence of visible leadership on the facility. Generally, there was thought to be correlation between the leadership style and the interactions observed in the facility.

*'Calm, serene manager. Calm, serene facility'*

## Acceptability of measurement tools in this Australian context

Facility staff reported that the survey took a median of 9 (IQR 5, 10; minimum 1, maximum 30) minutes. (Table 3) Internal reliability of the scales was generally acceptable: Cronbach's alpha was 0.96 for the Shortell Scale, 0.85 for the HTVI-EE, 0.524 for the HTVI-TC and 0.825 for the HTVI items. Shortell scales scores correlated significantly with HTVI-EE ( $r = 0.89$ ,  $p < 0.001$ ) and HTVI-Comm ( $r = 0.72$ ,  $p < 0.001$ ). Staff rated communication was weakly positively associated with the observed care quality ( $r^2 = 0.097$  for the Shortell total scales score; 0.056 for the HTVI-EE and 0.028 for the HTVI-Communication)

Respondents perceived greater relevance of the survey in high level care facilities. Similarly there was concern that the questions may have limited relevance to some groups of staff (such as non-care staff). Some respondents felt that the questions did not allow them to indicate the variability present in their facility.

Family respondents reported that the F-involve survey took a median of 5.5 minutes (IQR 5, 10; minimum 1, maximum 60). Some family respondents contended that "not applicable" should be provided for all questions, feeling that the survey remained too dementia specific. Several respondents felt questions could be answered with yes/no responses.

Research staff using the OIQ questioned the usefulness of the tool. They felt that the tool did not facilitate adequate assessment of the physical environment or communication. Measures of physical spaces (such as gardens and outdoor areas) were difficult to rate and differentiate and the relationship to level of care and resident engagement was difficult to determine. There was great variation in design as well as environment across facilities and this was difficult to assess. The OIQ was not perceived effective in measuring leadership, even though there appeared to be a correlation between the leadership style and the interactions observed in the facility. The influence of visible leadership on staff and residents was described as 'palpable' but impossible to score. Research staff felt that the specific staff rostered at the time of observation may influence results, as did the unit type observed at mealtime (eg. high care or low care unit). Applicability of some items in the tool in low level care environments was particularly uncertain.

## Discussion

### Main findings and interpretation

We found evidence that several aspects of organisational culture are rated positively in Australian long-term aged care facilities by both staff working in facilities, and the next-of-kin of residents. However, there was variability within individual participating facilities, and within the data collected, which included both positive and negative perceptions of aspects of organisational culture.

The qualitative data revealed substantial overlap between issues cited as important by both staff and family participants, such as communication, leadership and team work.

Leadership was consistently perceived to be important and seemed to impact on concrete outcomes such as staff retention. Existing organisational culture appeared to be expressed in teamwork and care delivery. Similarly, observation within facilities also suggested that organisational culture could impact resident wellbeing.

### Implications

As far as we are aware this is the first systematic study of organisational culture in Australian long term aged care facilities. Application of these measurement tools is novel in an Australian context. The present study suggests that these tools have broad acceptability in the Australian context. The OIQ tool was perceived to have some limitations in relation to the areas of particular interest in the present study (such as leadership). These novel data indicate scope to specifically target improvements in organisational culture (seeking to improve teamwork, communication and leadership) in Australian residential aged care facilities.

### Strengths and limitations

This study was comprehensive, including triangulation of data, investigators and methods. The breadth of participants, including both staff and families, increases the reliability of results. Including residents in future data collections would further enhance the opportunities available to triangulate data sources. Gathering data from several sites and across states enhances generalisability of results to some extent. However, response rates for staff surveys were relatively low (19%) limiting generalizability. Furthermore, invitations to participate in the study were not random or universal, potentially introducing a selection bias and thus limiting

**Table 3.** Feedback on survey tools.

|                                                                                             | Strongly Disagree | Disagree | Unsure   | Agree     | Strongly Agree |
|---------------------------------------------------------------------------------------------|-------------------|----------|----------|-----------|----------------|
| <i>Communication and Leadership Subscales</i>                                               |                   |          |          |           |                |
| The survey questions are easy to understand                                                 | 1 (0%)            | 10 (3%)  | 8 (2%)   | 232 (66%) | 101 (29%)      |
| The survey captured my opinions regarding leadership and communication in our organisation. | 2 (1%)            | 19 (6%)  | 40 (12%) | 217 (63%) | 66 (19%)       |
| <i>F-involve survey</i>                                                                     |                   |          |          |           |                |
| The survey questions are easy to understand                                                 | 2 (1%)            | 6 (2%)   | 3 (1%)   | 236 (71%) | 80 (24%)       |
| The survey captured my opinions regarding my involvement in my family member's care         | 4 (1%)            | 19 (6%)  | 41 (12%) | 213 (64%) | 43 (13%)       |

doi:10.1371/journal.pone.0058002.t003

external generalizability. We also did not collect administrative data from participating facilities (such as staff ratios and turnover) that may strengthen future studies. Although participants expressed some concerns about the tools utilised, these were relatively minor. The collection of feedback regarding the tools used, and free text data in addition to the Likert scale responses, enriched the data available and is a strength of the present study.

### Results in context of other studies

The term culture change is usually used to indicate a fundamental reform process targeting attitudes and behaviour. Promoting resident choice has been an important component of many cultural change interventions in residential care settings [9,16]. Others promote a change of philosophy with a focus on normal activities in a home like environment [16]. However there are few other data regarding fundamentals staff interactions (teamwork, communication and leadership).

Our data are consistent with those suggesting that leadership can be harnessed to transform organisational function [17]. However, most work regarding organizational strategy has been done in the acute care sector and little is known regarding how residential care facilities identify and implement strategies to improve leadership. Similarly, our data are consistent with the empirical studies that have targeted improved communication. For example, a study targeting improved cooperation between staff and families of residents in nursing home dementia programs found positive outcomes for all groups [18]. The findings of the present study are also consistent with studies from other countries

### References

1. Australian Institute of Health and Welfare (2007) Dementia in Australia: National data analysis and development. Canberra: AIHW.
2. Beer C, Horner B, Almeida OP, Scherer S, Lautenschlager NT, et al. (2009) Current experiences and educational preferences of general practitioners and staff caring for people with dementia living in residential facilities. *BMC Geriatr* 9: 36.
3. Beer C, Lowry R, Horner B, Almeida OP, Scherer S, et al. (2010) Development and evaluation of an educational intervention for general practitioners and staff caring for people with dementia living in residential facilities. *Int Psychogeriatr*: 1–9.
4. Beer C, Horner B, Flicker L, Scherer S, Lautenschlager NT, et al. (2011) A cluster-randomised trial of staff education to improve the quality of life of people with dementia living in residential care: the DIRECT study. *PLoS One* 6: e28155.
5. Hill C, Jones G (2001) Strategic Management: an integrated approach. Boston: Houghton Mifflin.
6. Anderson RA, Issel LM, McDaniel RR Jr (2003) Nursing homes as complex adaptive systems: relationship between management practice and resident outcomes. *Nurs Res* 52: 12–21.
7. Cummings GG, Macgregor T, Davey M, Lee H, Wong CA, et al. (2009) Leadership styles and outcome patterns for the nursing workforce and work environment: A systematic review. *Int J Nurs Stud*.
8. Ronch JL (2004) Changing Institutional Culture – Can We Re-Value the Nursing Home? *Journal of Gerontological Social Work* 43: 61–82.
9. Rahman AN, Schnelle JF (2008) The nursing home culture-change movement: recent past, present, and future directions for research. *Gerontologist* 48: 142–148.
10. Beer CD, Horner B, Almeida OP, Scherer S, Lautenschlager NT, et al. (2010) Dementia in residential care: education intervention trial (DIRECT); protocol for a randomised controlled trial. *Trials* 11: 63.
11. Scott J, Vojir C, Jones K, Moore L (2005) Assessing nursing homes' capacity to create and sustain improvement. *J Nurs Care Qual* 20: 36–42.
12. Scott-Cawiezell J, Schenkman M, Moore L, Vojir C, Connolly RP, et al. (2004) Exploring nursing home staff's perceptions of communication and leadership to facilitate quality improvement. *J Nurs Care Qual* 19: 242–252.
13. Upenieks VV, Lee EA, Flanagan ME, Doebbeling BN (2009) Healthcare Team Vitality Instrument (HTVI): developing a tool assessing healthcare team functioning. *J Adv Nurs*.
14. Reid RC, Chappell NL, Gish JA (2007) Measuring family perceived involvement in individualized long-term care. *Dementia* 6: 89–104.
15. Rantz MJ, Zwyzart-Stauffacher M, Mehr DR, Petroski GF, Owen SV, et al. (2006) Field testing, refinement, and psychometric evaluation of a new measure of nursing home care quality. *J Nurs Meas* 14: 129–148.
16. Robinson SB, Rosher RB (2006) Tangling with the barriers to culture change: creating a resident-centered nursing home environment. *J Gerontol Nurs* 32: 19–25; quiz 26–17.
17. Stafrace S, Lilly A (2008) Turnaround in an aged persons' mental health service in crisis: a case study of organisational renewal. *Aust Health Rev* 32: 577–582.
18. Robison J, Curry L, Gruman C, Porter M, Henderson CR Jr, et al. (2007) Partners in caregiving in a special care environment: cooperative communication between staff and families on dementia units. *Gerontologist* 47: 504–515.

suggesting that improved communication and leadership are required for nursing homes to continue to develop as organizations pursuing quality improvement [12].

### Key points

- Several aspects of organisational culture were rated positively in participating long-term aged care facilities.
- There was variability between and within facilities.
- Existing organisational culture appeared to be expressed in care delivery and teamwork.
- Teamwork, communication and leadership are potential targets of specific interventions to enhance organisational culture in Australian residential aged care facilities.

### Acknowledgments

The authors acknowledge the study staff: Rachel Lowry, Jo Sleeman, Emma Carter, Andrea Steel and Ash Osborne. The authors gratefully acknowledge the assistance of Dr Jill Scott-Cawiezell and Dr R. Colin Reid who kindly allowed us to use and modify the measurement tools they had developed. The authors also acknowledge the facilities, staff and managers, residents and next-of-kin who participated in this study.

### Author Contributions

Conceived and designed the experiments: CE-B BH LV. Performed the experiments: CE-B BH LV. Analyzed the data: CE-B BH LV. Contributed reagents/materials/analysis tools: CE-B. Wrote the paper: CE-B BH LV.
